# Supplementary material for: AKR1D1 is a novel regulator of metabolic phenotype in human hepatocytes and is dysregulated in non-alcoholic fatty liver disease
Source: PubMed Central journal article supplement (PMC6744372; doi:10.1016/j.metabol.2019.153947), 2019-10

Supplementary figure 1

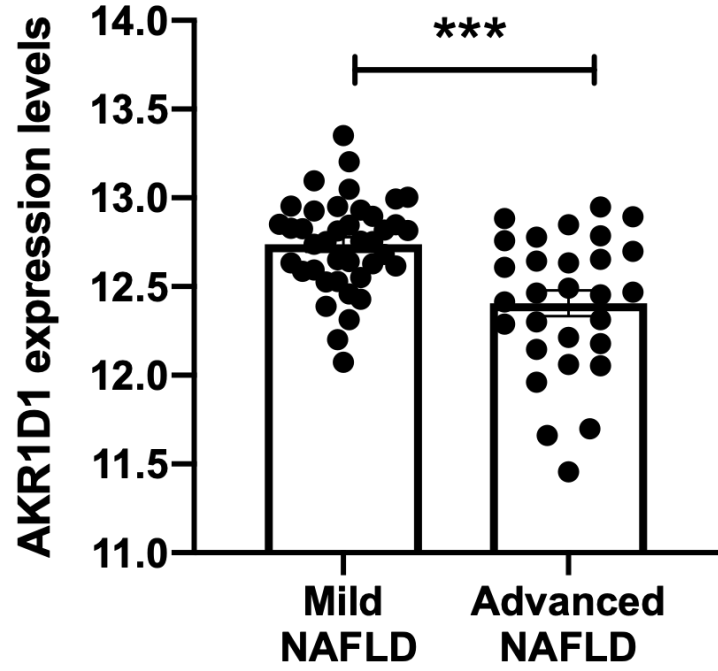

Supplementary figure 2

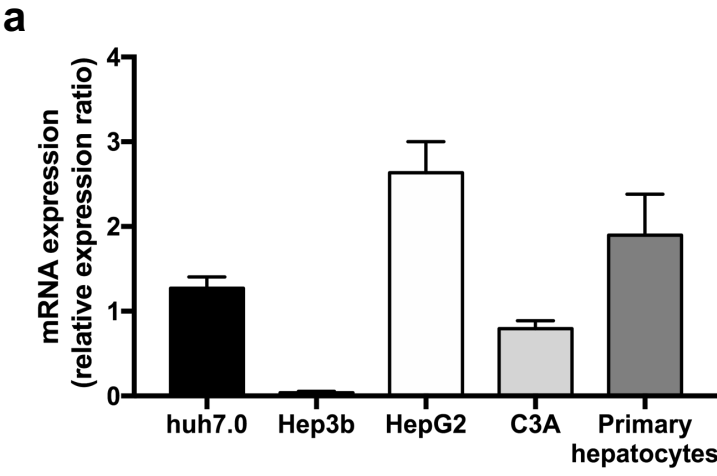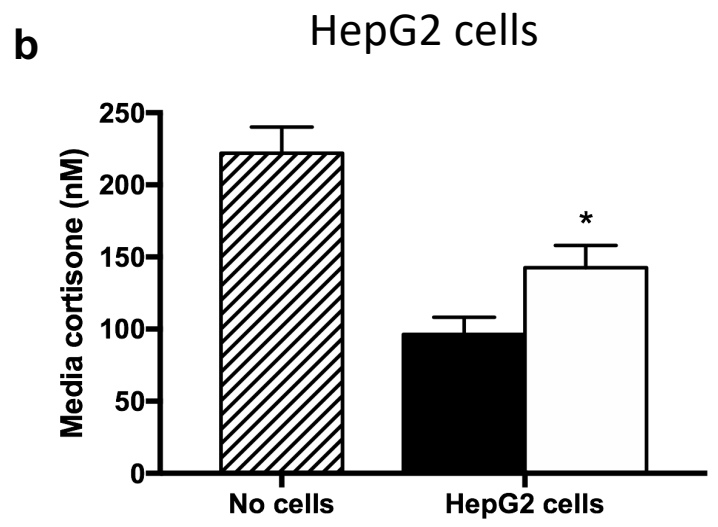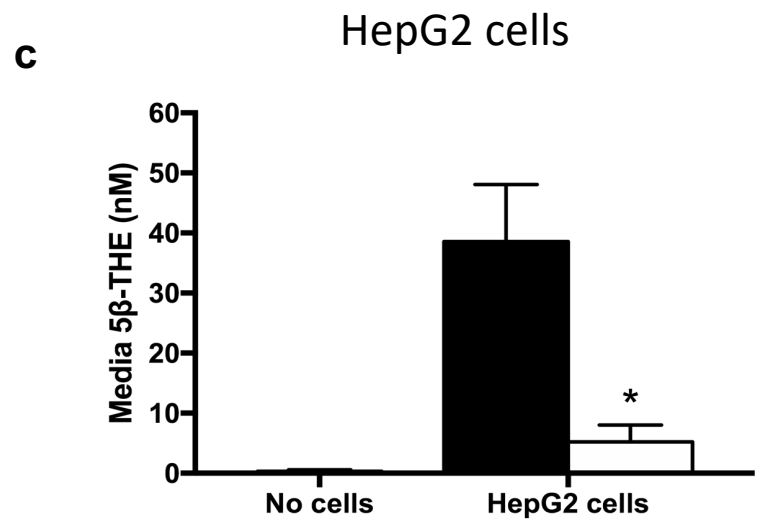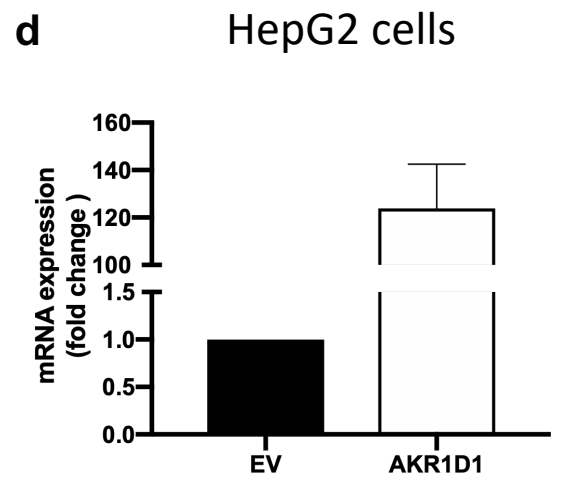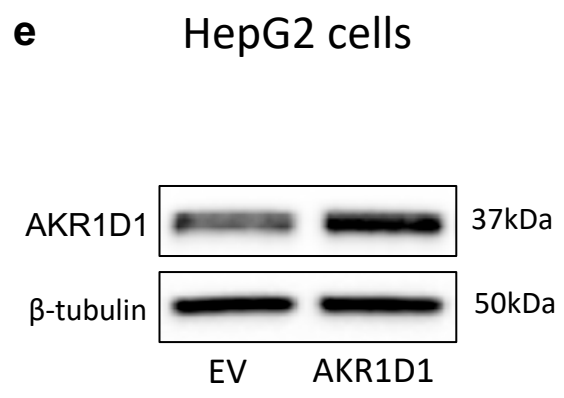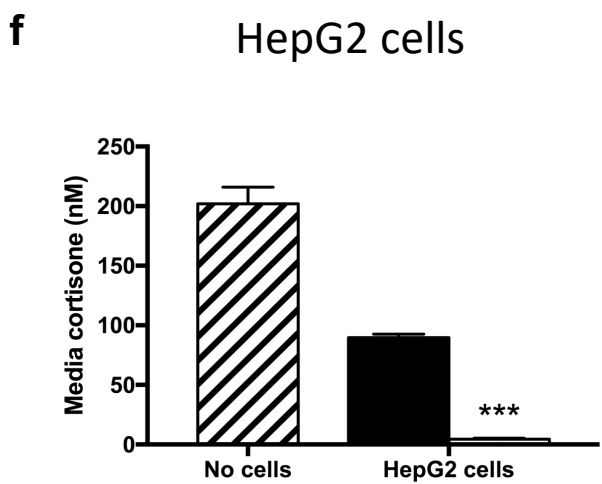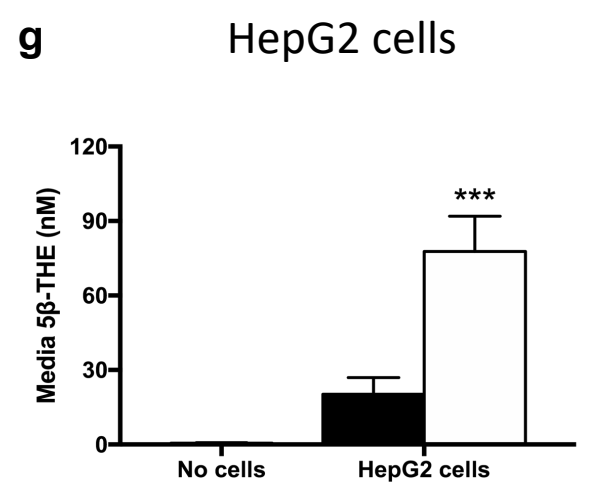

Supplementary figure 3

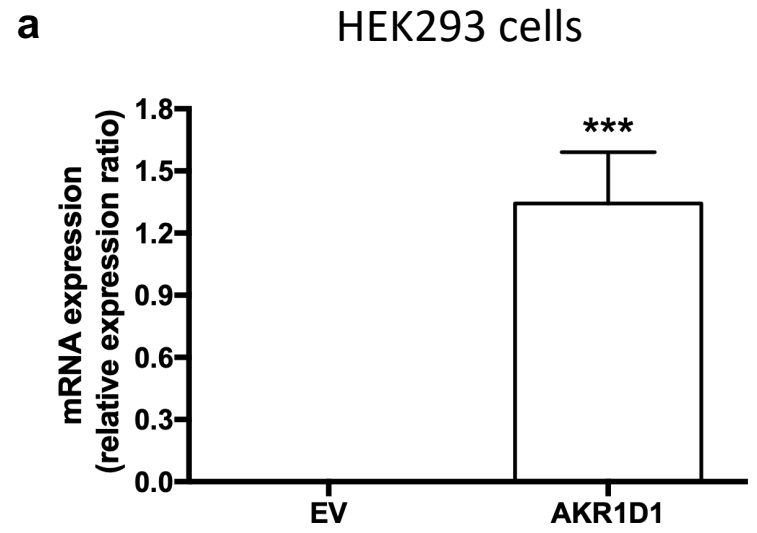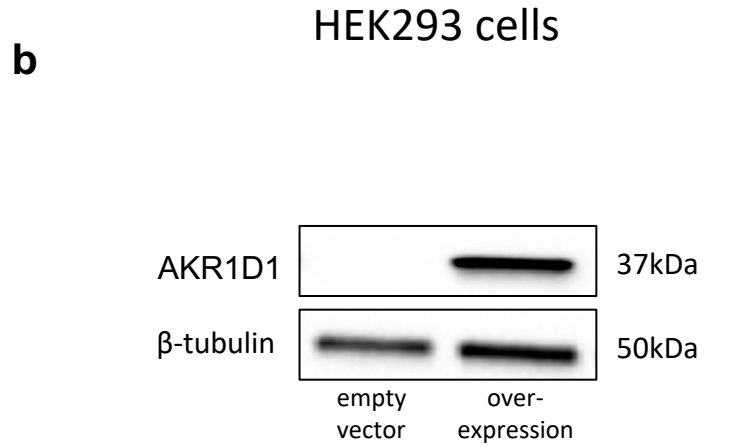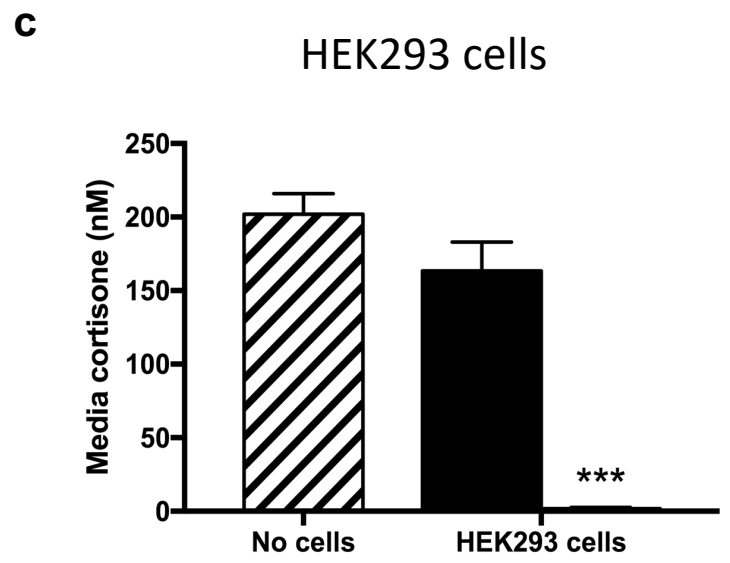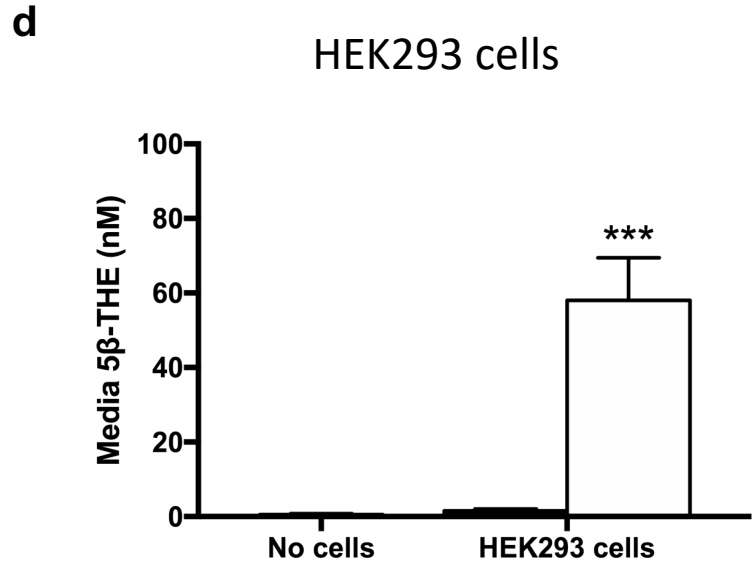

**Supplementary figure 4**

| <b>Gene</b>  | <b>LogFC</b> | <b>FDR-adjusted P value</b> |
|--------------|--------------|-----------------------------|
| SLC2A1       | 1.17         | 1.89x10 <sup>-2</sup>       |
| GAPDH        | -0.30        | 2.93x10 <sup>-1</sup>       |
| CYP7A1       | 3.49         | 2.44x10 <sup>-3</sup>       |
| FASN         | 0.95         | 1.49x10 <sup>-2</sup>       |
| ACACA (ACC1) | 0.74         | 2.40x10 <sup>-2</sup>       |
| PPARA        | -0.52        | 2.82x10 <sup>-2</sup>       |
| SCD          | 0.61         | 3.49x10 <sup>-2</sup>       |
| ABCA1        | -0.86        | 9.11x10 <sup>-3</sup>       |
| PYGL         | -0.61        | 3.22x10 <sup>-2</sup>       |
| SREBF1       | 0.57         | 2.23x10 <sup>-2</sup>       |

Supplementary figure 5

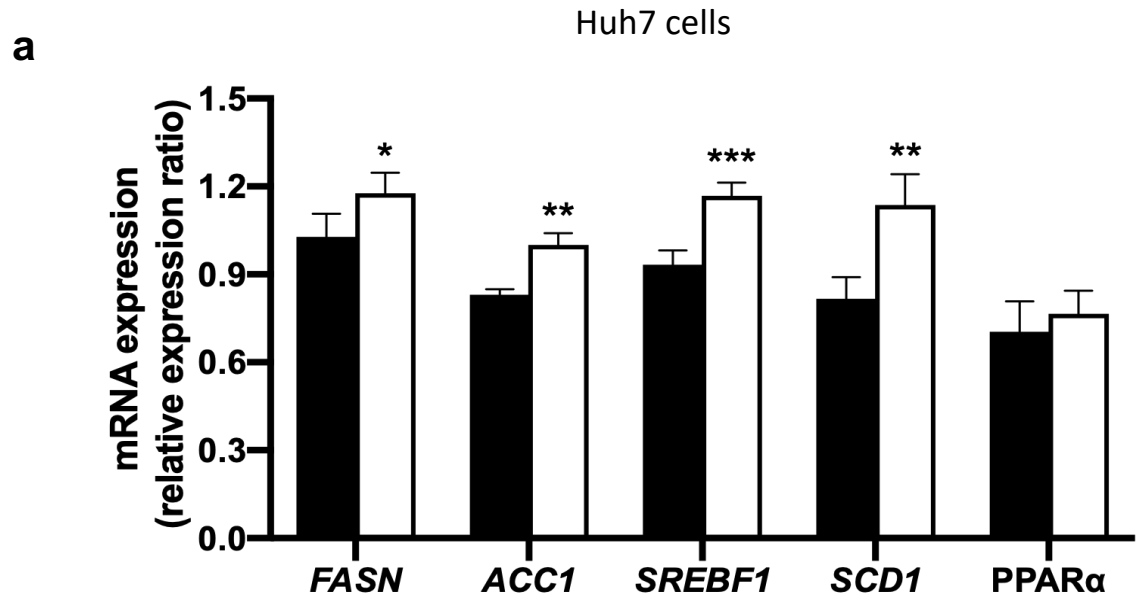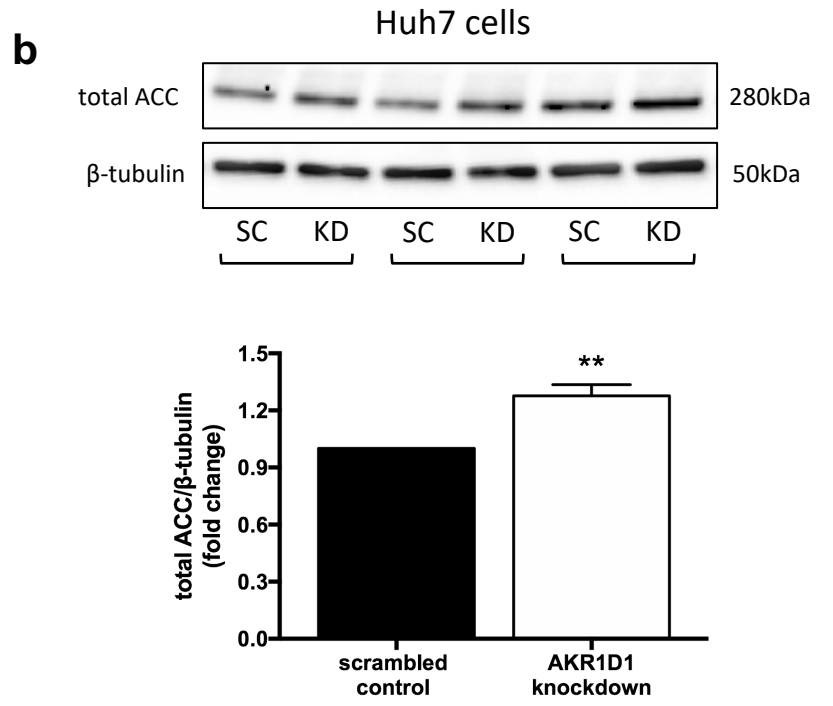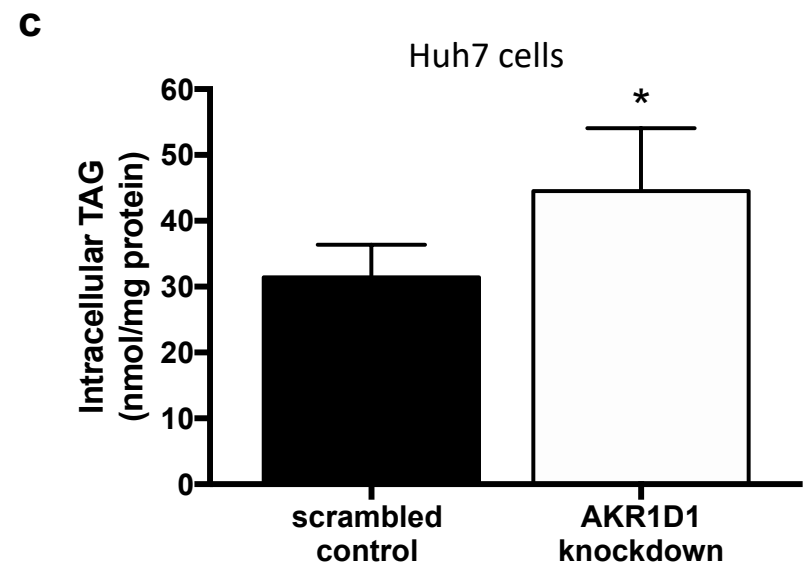

Supplementary figure 6

a

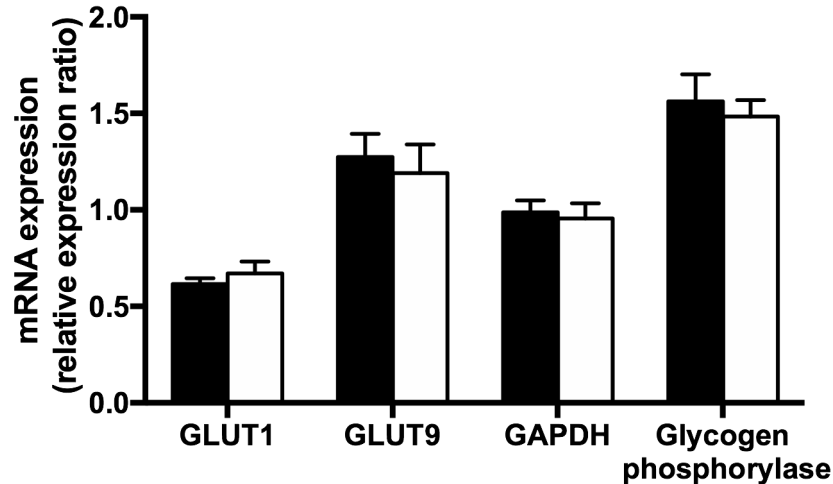

b

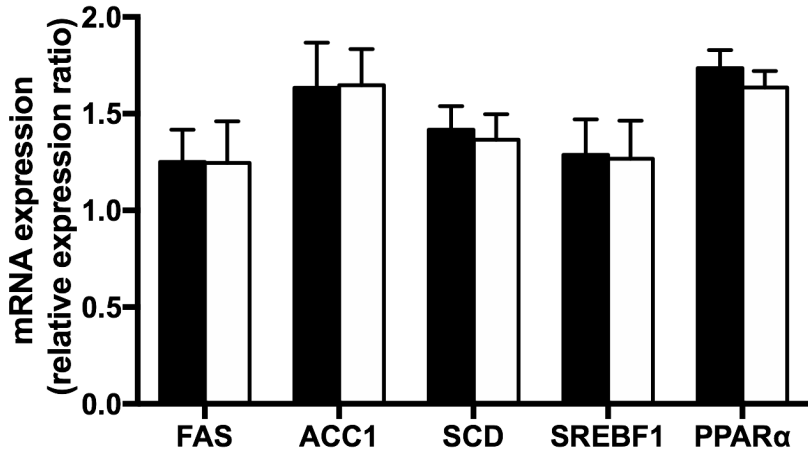

c

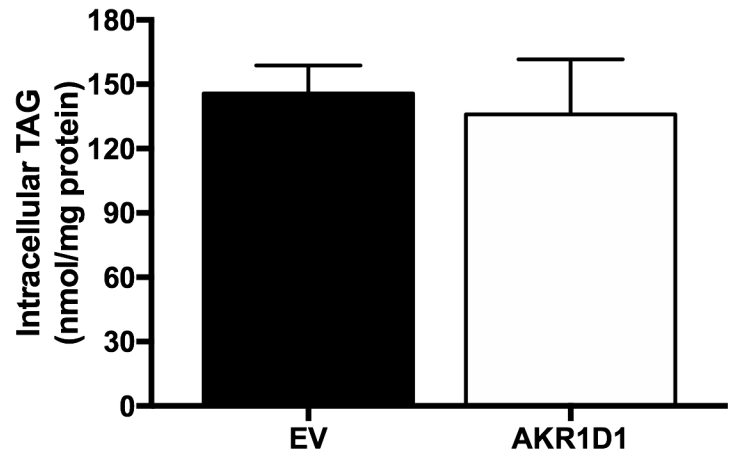

# Supplementary figure 7

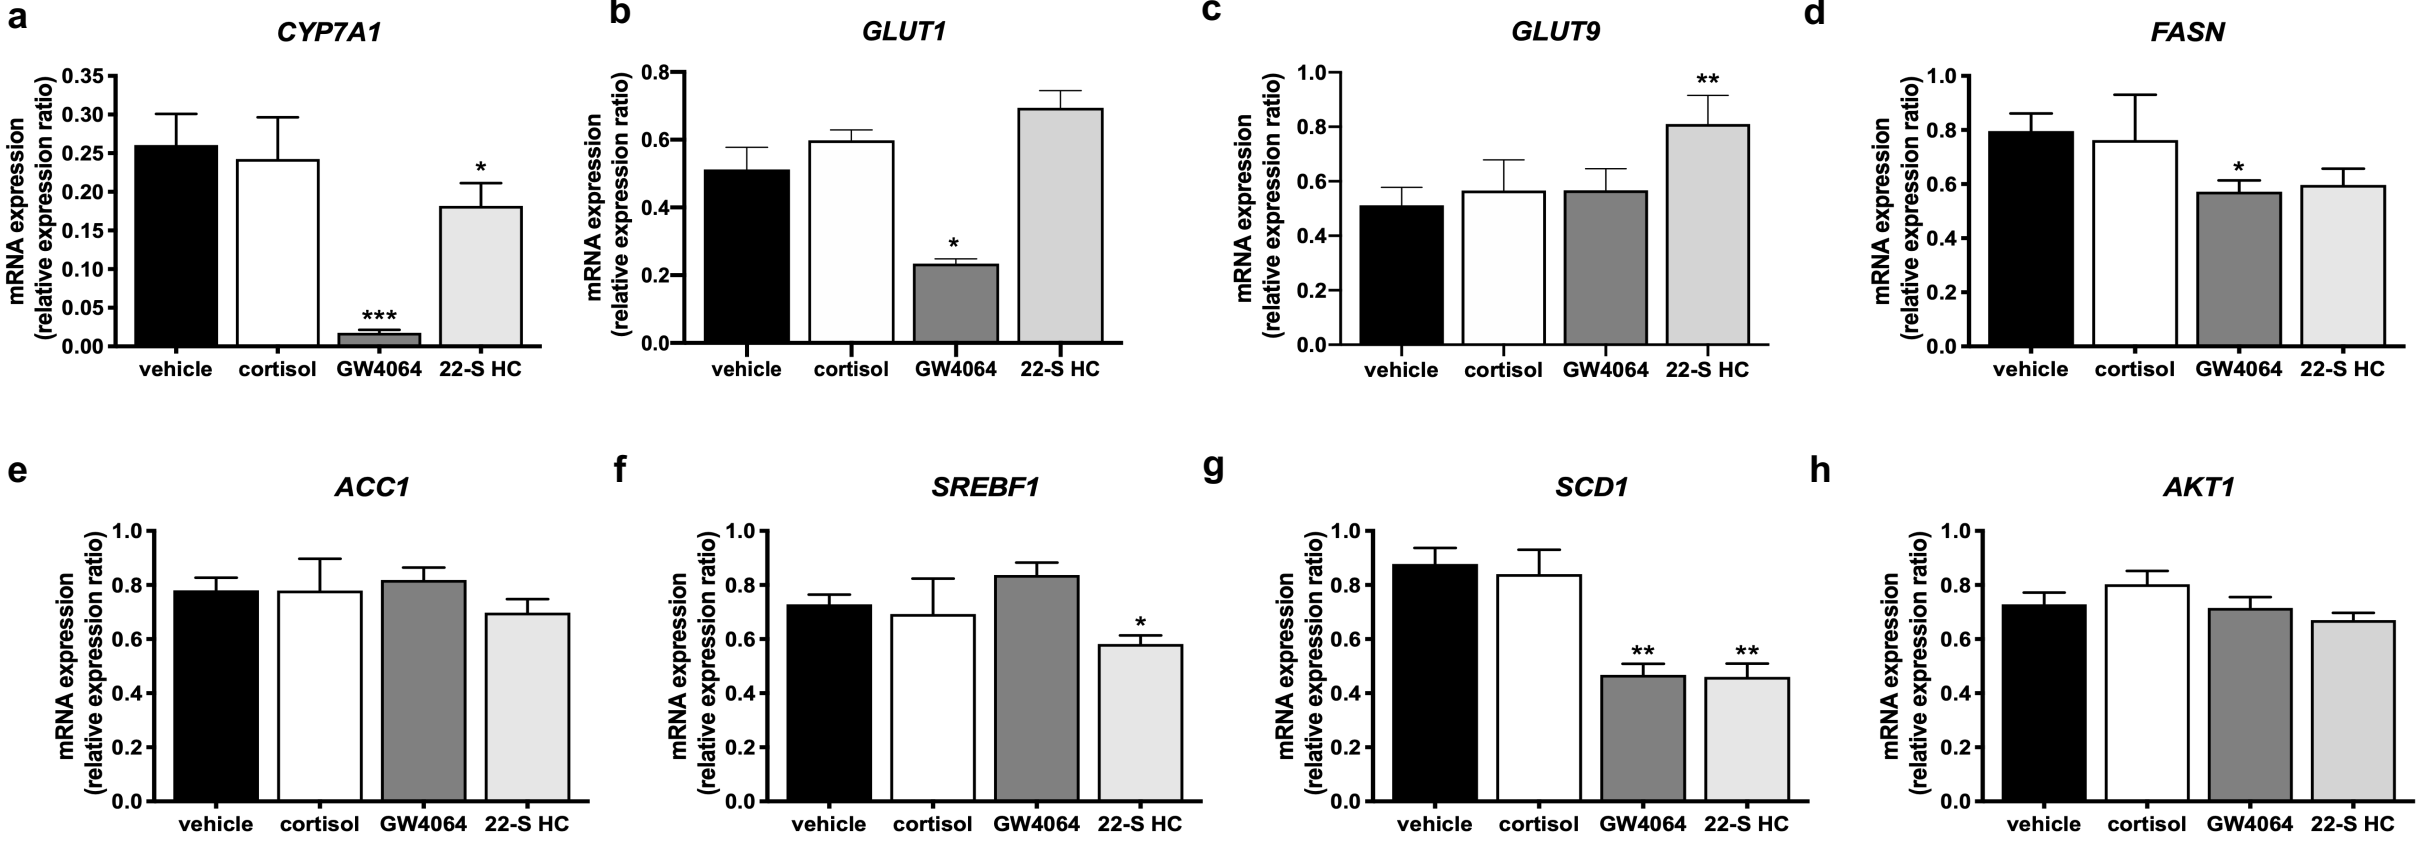

Supplementary figure 8

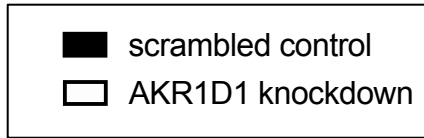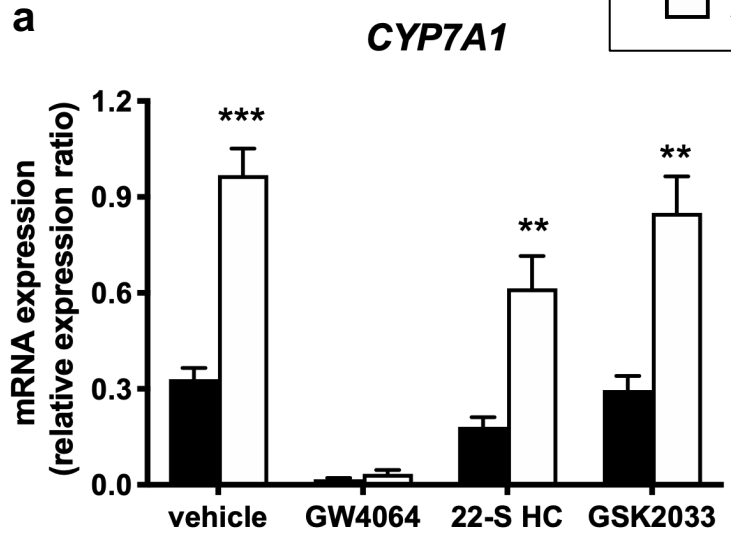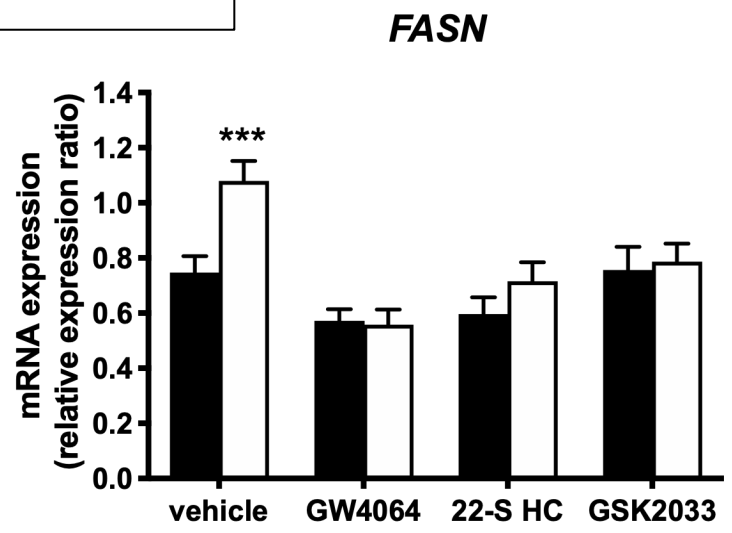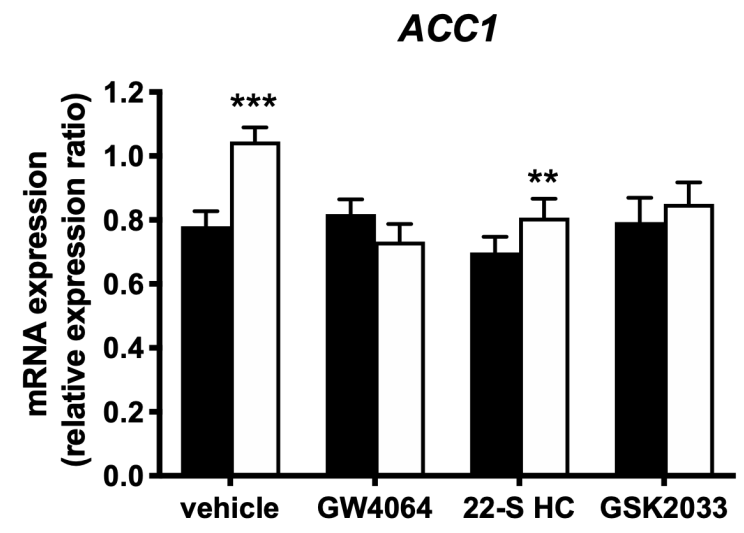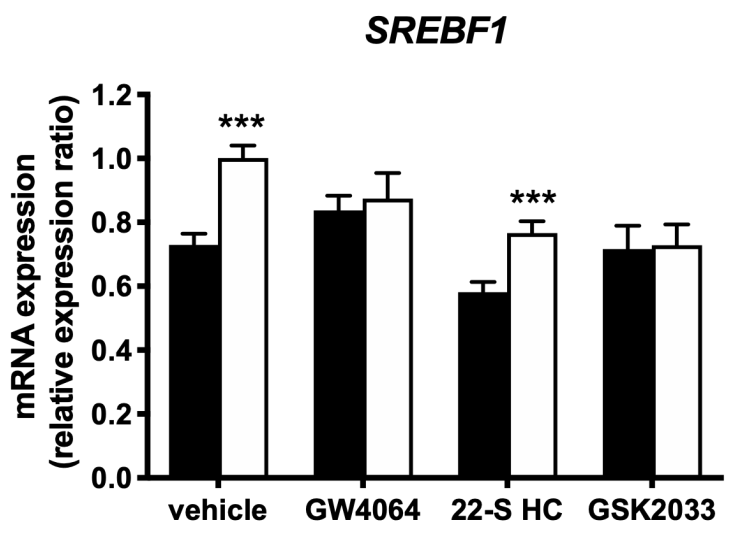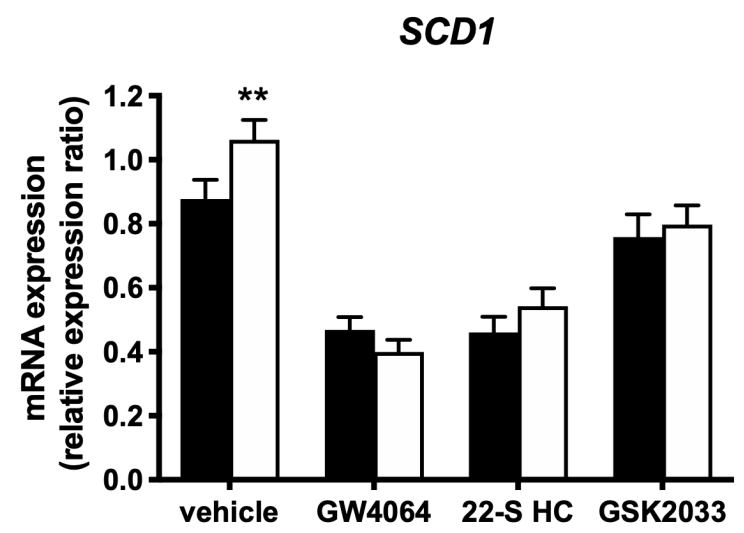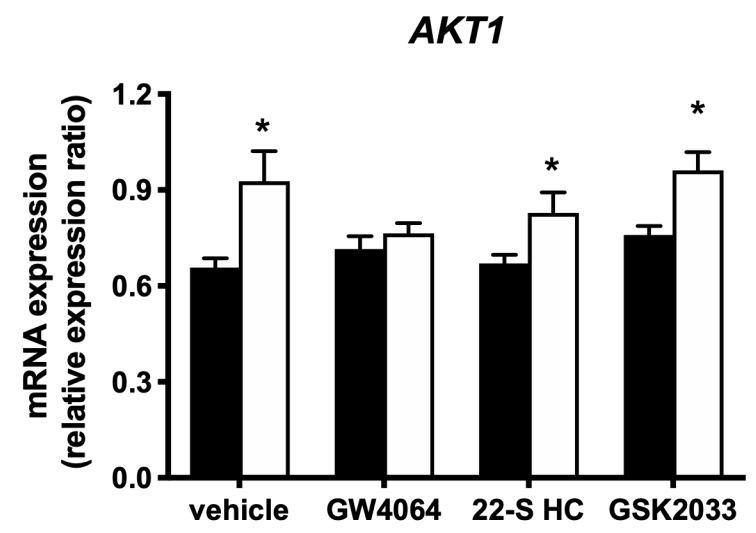



Supplementary figure 9

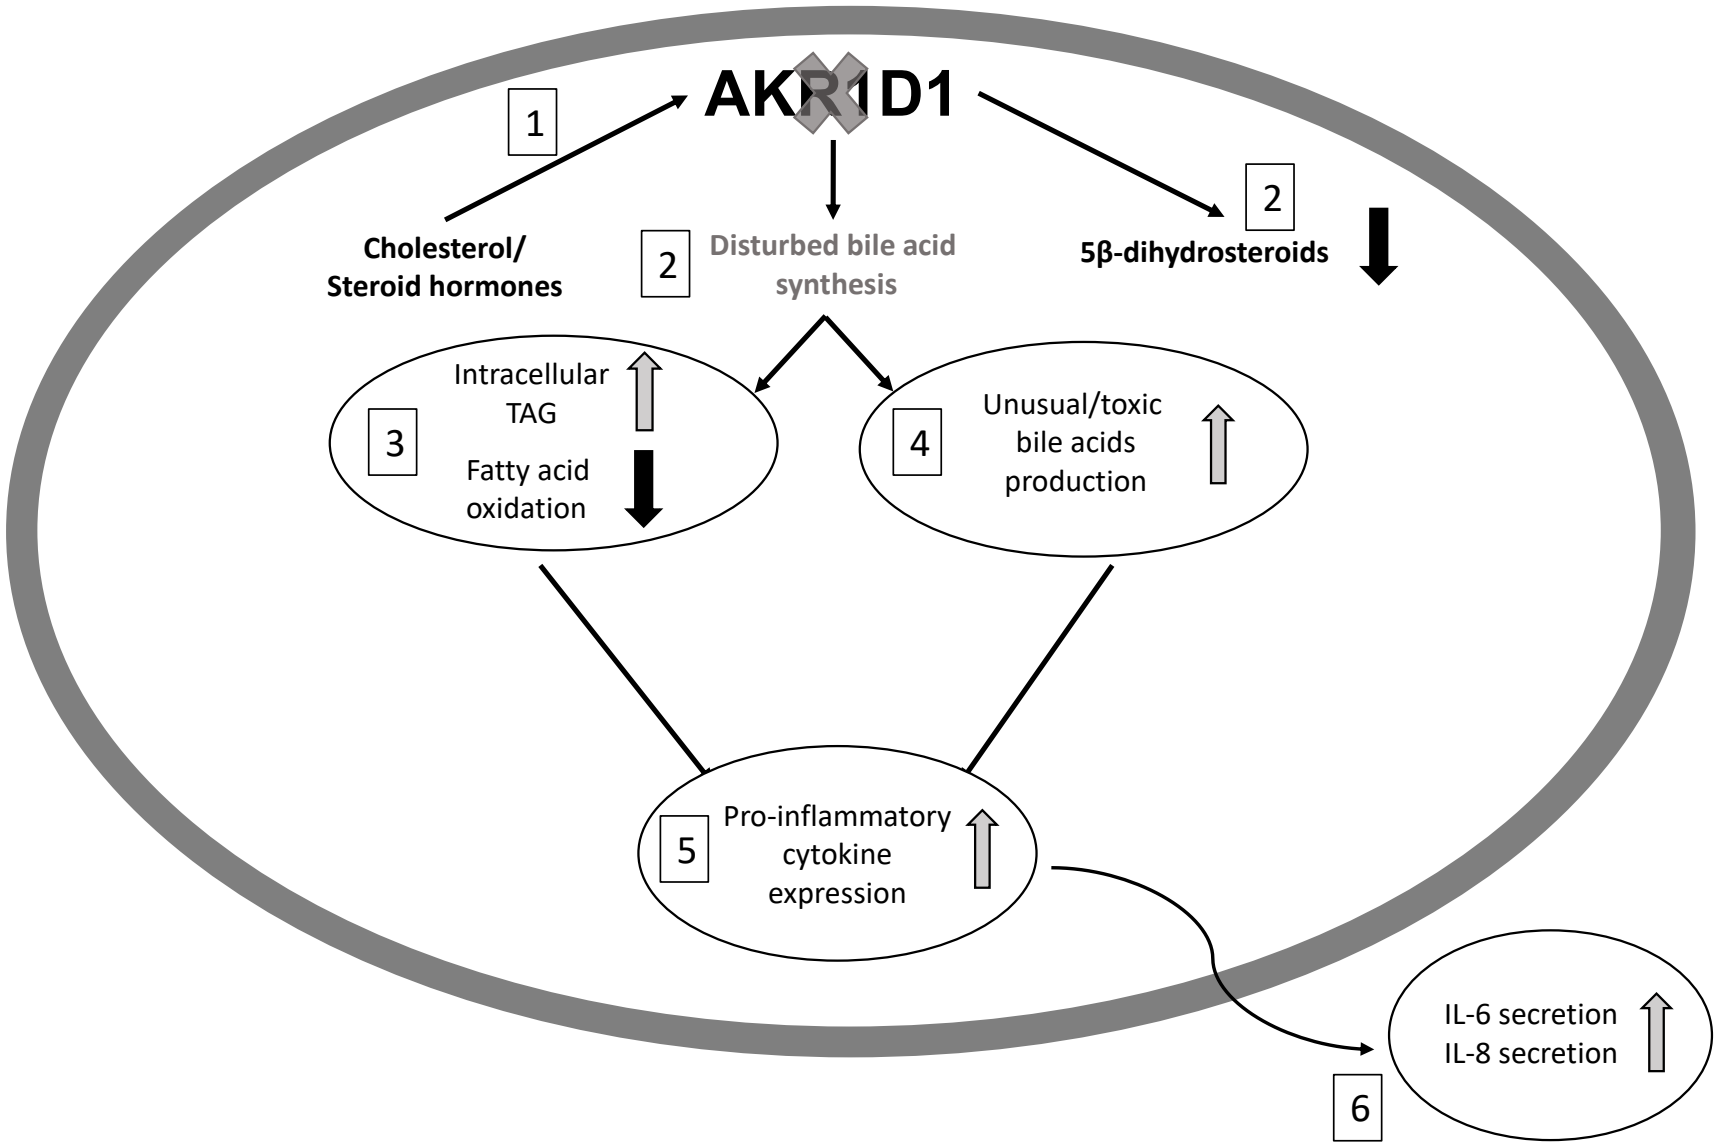

Supplement: mmc1.pdf [file mmc1.pdf]
